# Supplementary material for: Multi-step control over self-assembled hydrogels of peptide-derived building blocks and a polymeric cross-linker
Source: Royal Society of Chemistry journal article supplement (doi:10.1039/c5sm02088c), 2015-10-13
Supplement: c5sm02088c1.pdf [file c5sm02088c1.pdf]

## Supporting Information for: **Multi-step control over self-assembled hydrogels of peptide-derived building blocks and a polymeric cross-linker**

Van Duc Nguyen<sup>a</sup>, Asish Pal<sup>b</sup>, Frank Sniijkers<sup>a</sup>, Mathieu Colomb-Delsuc<sup>b</sup>, Giulia Leonetti<sup>b</sup>, Sijbren Otto<sup>\*b</sup>, and Jasper van der Gucht<sup>\*a</sup>

<sup>a</sup>Physical Chemistry and Soft Matter, Wageningen University  
Dreijenplein 6, 6703 HB Wageningen (The Netherlands)

<sup>b</sup>Centre for Systems Chemistry, Stratingh Institute, University of Groningen  
Nijenborgh 4, 9747 AG Groningen (The Netherlands)

October 12, 2015

### **Ultra performance liquid chromatography (UPLC) analyses.**

UPLC analyses were performed on a Waters Acquity H-class machine equipped with diode array UV/Vis detector. The eluents, acetonitrile and water contained 0.1% of TFA. The peptide solutions were eluted with a gradient as shown in detail in Table S1 and Fig. S1.

Table S1: Solution components eluted using acetonitrile and water containing 0.1 % of TFA

| Time (min) | % of Acetonitrile | % of Water |
|------------|-------------------|------------|
| 0          | 10                | 90         |
| 1          | 10                | 90         |
| 1.3        | 25                | 75         |
| 3          | 28                | 72         |
| 11         | 40                | 60         |
| 11.5       | 95                | 5          |
| 12         | 95                | 5          |
| 12.5       | 10                | 90         |
| 17         | 10                | 90         |

### **Nuclear Magnetic Resonance spectrometry (H-NMR) analyses.**

The final product of triblock copolymers was dissolved in deuterium oxide to determine the structure by <sup>1</sup>H-NMR on a Bruker Avance III 400 MHz Nuclear Magnetic Resonance (NMR) spectrometer. The measured <sup>1</sup>H-NMR spectrum of the triblock copolymer is shown in Fig. S2. Following Lemmers *et al.* [1], we determine the degree of polymerization (DP) by the ratio of the integrals of peak 1 to the one of PEG, taking into account the number of protons in a PEG monomer and group 1 of the triblock copolymer:  $DP = 2I_1N_{PEG}/I_{PEG} = 50$ , with  $I_1$  the integral surface of the group 1-peak (see [1] for details),  $I_{PEG}$  the surface of the PEG-peak, and  $N_{PEG}$  the number of PEG-monomers in each chain. Hence we end up with a triblock with a neutral mid-block and two negatively charged end-blocks: PSPMA<sub>25</sub>-PEO<sub>230</sub>-PSPMA<sub>25</sub>.

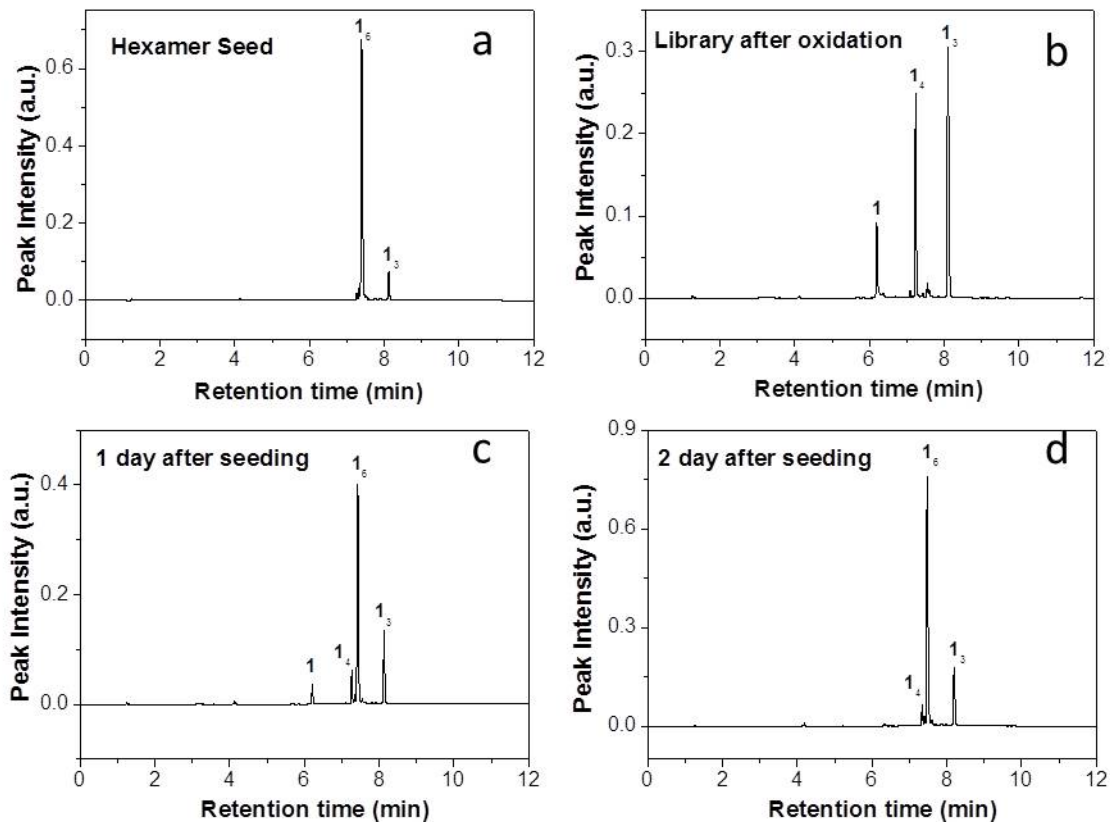

Figure S1: **UPLC traces for:** (a) pre-formed hexamer seed, (b) 3.8 mM solution of **1** after oxidation by sodium perborate solution, (c) 1 day and (d) 2 days after 20 % seeding by hexamer seed.

## Volume fraction and entanglement length estimations

Volume fraction of  $\mathbf{1}_6$  is estimated using  $\phi = \pi \rho a d^2 / 4$  [2], where  $a = 0.48$  nm, and  $d = 7$  nm are the length per monomer and diameter of  $\mathbf{1}_6$ , respectively. The number density of  $\mathbf{1}_6$   $\rho = 3.8 \times 10^{23} \text{ m}^{-3}$  is estimated using  $\rho = c N_A$ , where  $c = 0.63 \text{ mole/m}^3$  the  $\mathbf{1}_6$  concentration, and  $N_A = 6.02 \times 10^{23}$  Avogadro's number. Inserting these numbers to the above equation, we obtain  $\phi = 6.7 \times 10^{-3}$ .

From this, we obtain the entanglement length as  $L_e \simeq (L_P)^{1/5} (a\rho)^{-2/5}$  [3] with  $L_P = 1.5 \mu\text{m}$  the measured persistence length. This gives  $L_e \simeq 135$  nm.

## References

- [1] M. Lemmers, J. Sprakel, I. K. Voets, J. V. D. Gucht, and M. A. C. Stuart, "Multiresponsive reversible gels based on charge-driven assembly," *Angewandte Chemie*, vol. 49, pp. 708–711, 2010.
- [2] D. C. Morse, "Viscoelasticity of concentrated isotropic solutions of semiflexible polymers. 1. model and stress tensor," *Macromolecules*, vol. 31, pp. 7030–7043, 1998.
- [3] F. MacKintosh, J. Kas, and P. Janmey, "Elasticity of semiflexible biopolymer networks," *Physical review letters*, vol. 75, p. 4425, 1995.

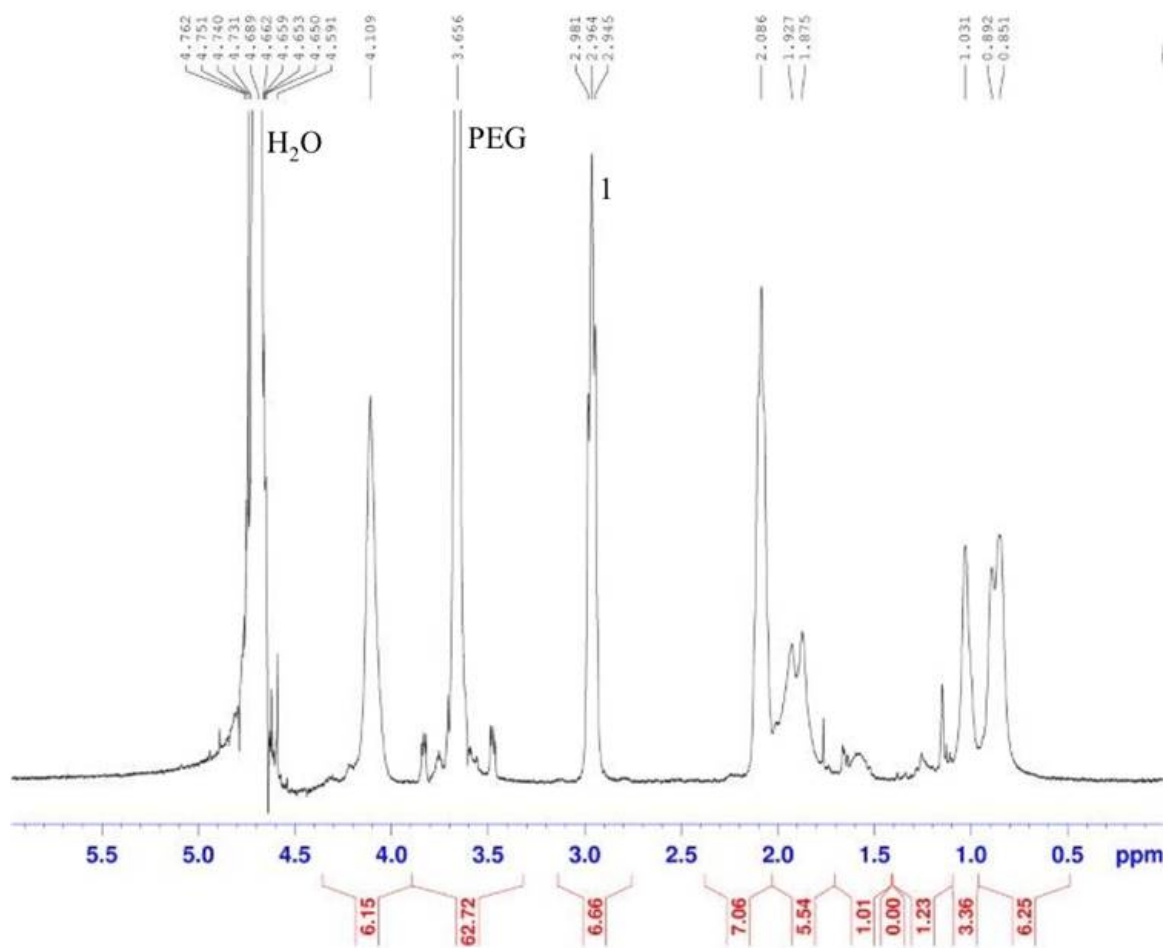

Figure S2:  $^1\text{H}$ -NMR-spectrum of the negatively charged triblock copolymer.
